# Supplementary material for: Assessing the Recovery Assessment Scale Across Time
Source: Atypon-hosted journal article supplement (doi:10.1176/appi.ps.202000521), 2021-03-18
Supplement: appi.ps.202000521.ds001.pdf [file appi.ps.202000521.ds001.pdf]

| Model                        | $\chi^2$ | <i>df</i> | <i>p</i> | RMSEA | 90% CI      | CFI   | TLI   | <i>p</i> | Constraint Tenable |
|------------------------------|----------|-----------|----------|-------|-------------|-------|-------|----------|--------------------|
| Configural invariance        | 99.4     | 72        | 0.018    | 0.048 | 0.021-0.069 | 0.969 | 0.955 |          |                    |
| Metric invariance            | 103.883  | 80        | 0.038    | 0.042 | 0.011-0.064 | 0.973 | 0.965 | 0.811    | Yes                |
| Partial scalar invariance    | 109.665  | 87        | 0.051    | 0.040 | 0.000-0.061 | 0.975 | 0.969 | 0.565    | Yes                |
| Factor var/cov invariance    | 115.906  | 91        | 0.040    | 0.041 | 0.009-0.061 | 0.972 | 0.968 | 0.484    | Yes                |
| Latent factor mean T1 vs. T2 | 116.385  | 92        | 0.044    | 0.040 | 0.007-0.061 | 0.973 | 0.969 | 0.490    | Yes                |
| Latent factor mean T2 vs. T3 | 117.705  | 92        | 0.037    | 0.041 | 0.011-0.061 | 0.971 | 0.967 | 0.180    | Yes                |
| Latent factor mean T1 vs. T3 | 120.517  | 92        | 0.025    | 0.043 | 0.016-0.063 | 0.968 | 0.964 | 0.030    | No                 |
